# Supplementary material for: A Novel Compound, NK150460, Exhibits Selective Antitumor Activity against Breast Cancer Cell Lines through Activation of Aryl Hydrocarbon Receptor
Source: Oxford University Press journal article supplement (doi:10.1158/1535-7163.mct-14-0158), 2014-12-19
Supplement: 15357163mct140158-sup-127530_2_supp_2752256_nfc1cy.docx [file 15357163mct140158-sup-127530_2_supp_2752256_nfc1cy.docx]

Supplementary Table 4. Expression of Aryl Hydrocarbon Receptor (AhR) mRNA in various breast cancer cell lines.

| Cell line | ER | NK150460  sensitivity | AhR mRNA |  |
| --- | --- | --- | --- | --- |
| MCF-7 | + | sensitive | 10.7 |  |
| T-47D | + | sensitive | 106.2 |  |
| KPL-1 | + | sensitive | 15.1 |  |
| SK-BR-3 | - | sensitive | 6.8 |  |
| MDA-MB-468 | - | sensitive | 148.1 |  |
| MDA-MB-453 | - | sensitive | 5.9 |  |
| MDA-MB-231 | - | insensitive | 71.5 |  |
| MDA-MB-435S | - | insensitive | 76.6 |  |
| Hs0578T | - | insensitive | 143.0 |  |
